# Supplementary material
Source: Research Square preprint supplement (doi:10.21203/rs.3.rs-9111241/v1)
Supplement: Supplementary file 1 [file c91841700e152df8311edd5a.docx]

**Supplementary Information**


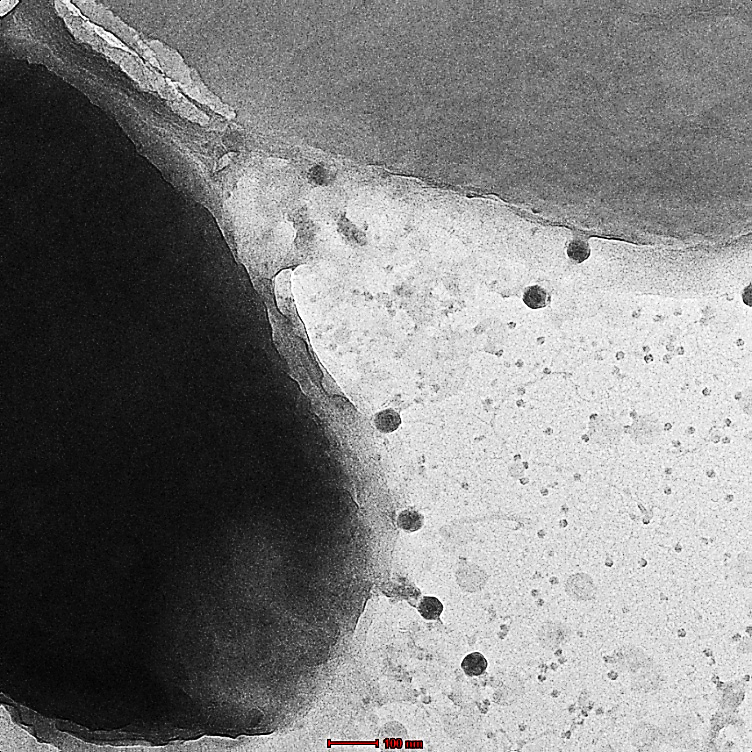


**S1**


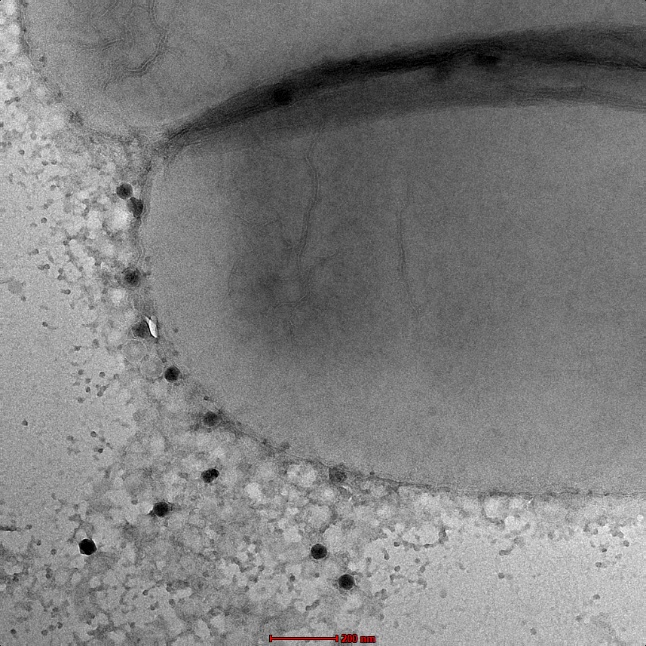


**S2**


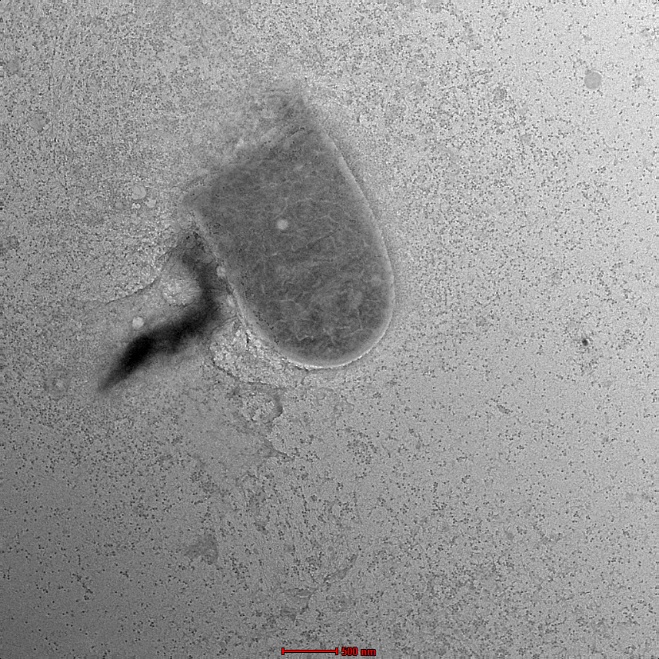


**S3**

**Transmission electron microscopy of lysis event of phage SAKp26.2: S1** TEM image showing SAKp26.2 adsorption to the surface of host bacterial cells **S2 and S3** TEM image showing SAKp26.2 infecting the host bacterial culture, followed by its lysis

**S4**


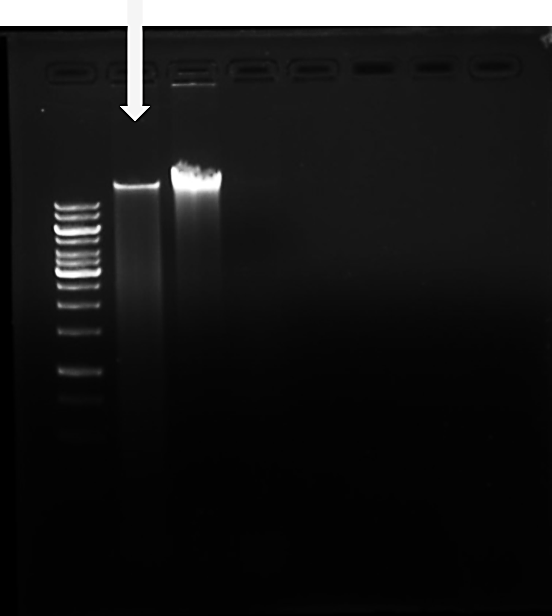

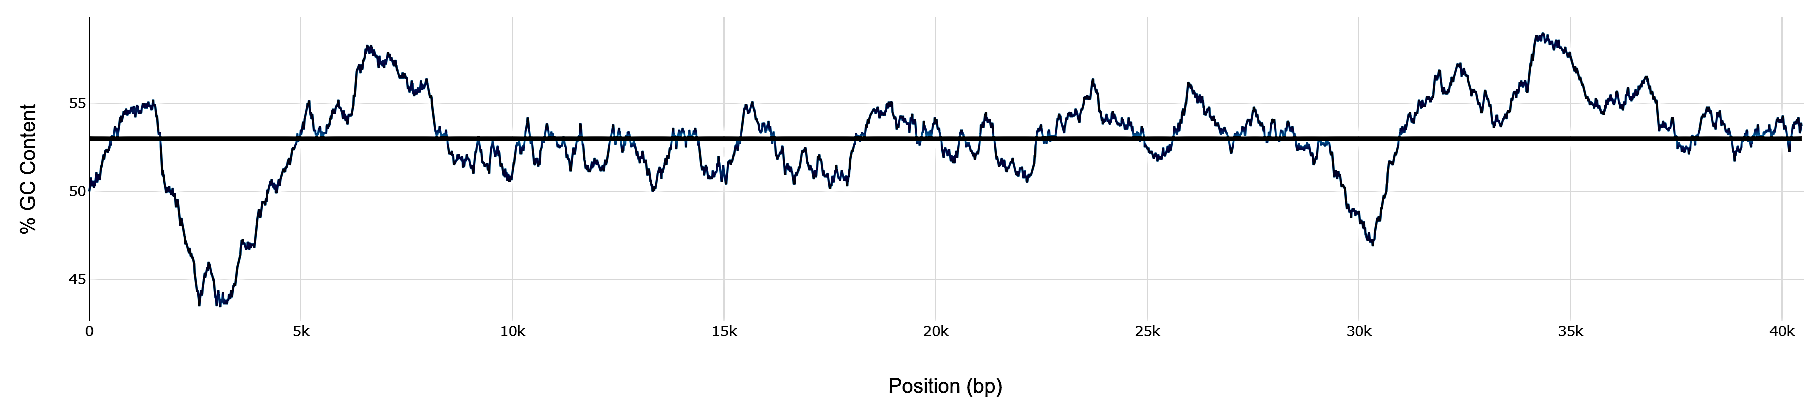


**S5**


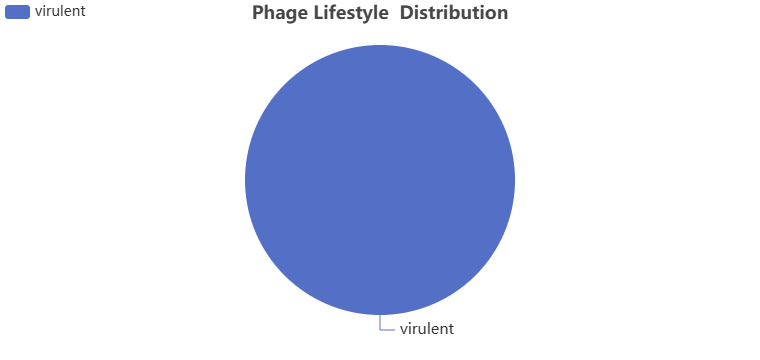


**S6**


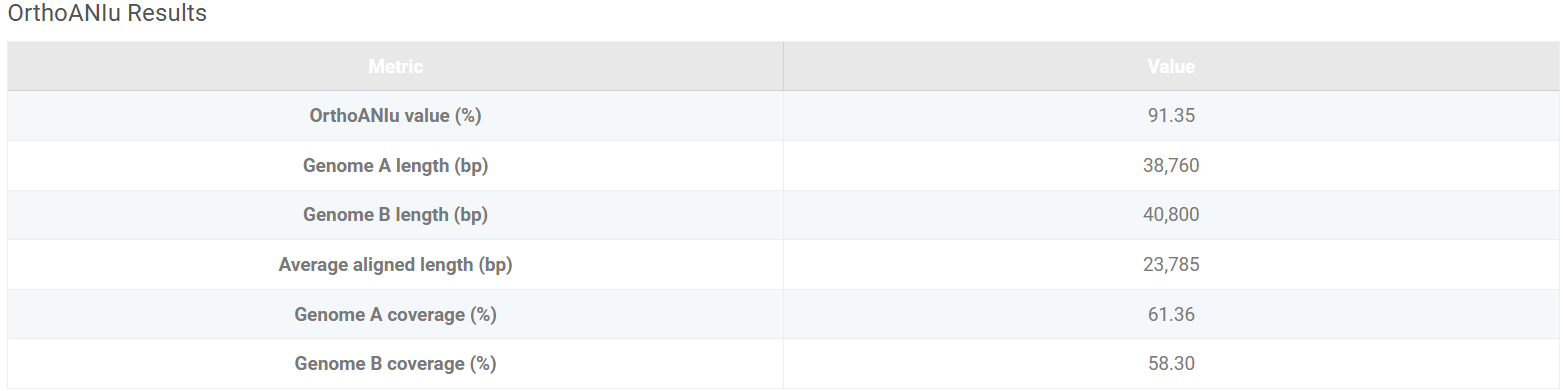


**S7**

**S8**


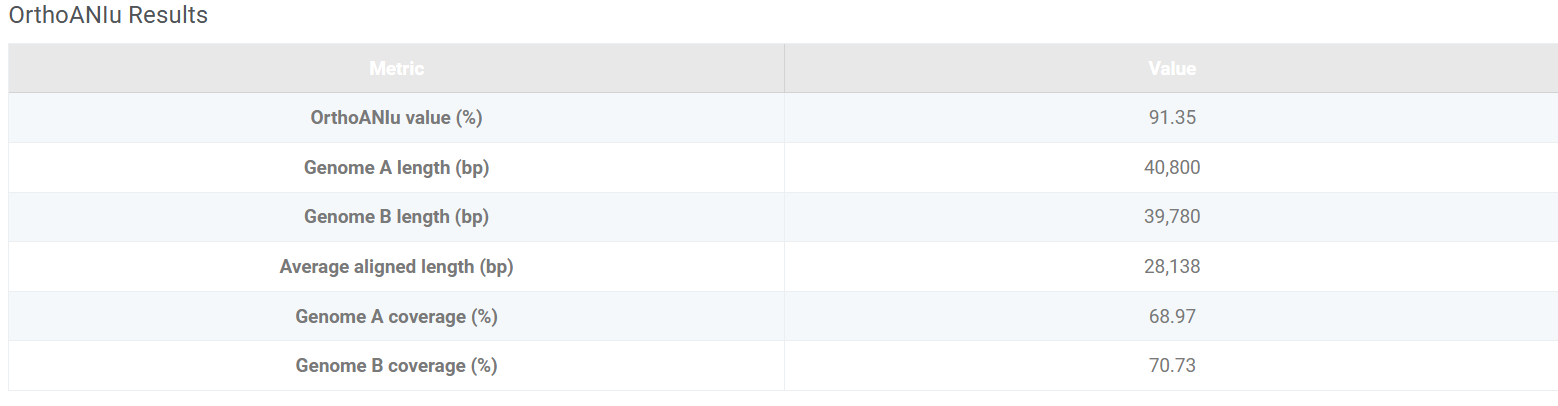

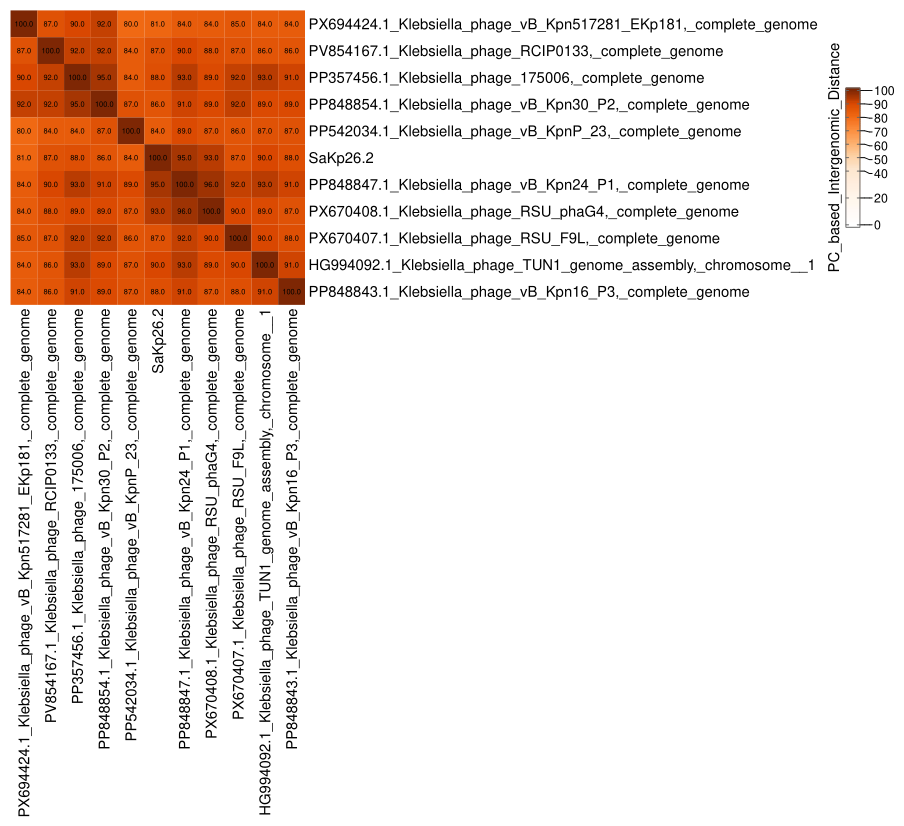


**S9**

**Genomic validation and comparative analyses of phage SAKp26.2.** **(S4)** Agarose gel electrophoresis showing the isolated genomic DNA of phage SAKp26.2 appearing as a single high-molecular-weight band (~40 kb). **(S5)** GC content variation across the SAKp26.2 genome. **(S6)** Phage lifestyle prediction indicating a virulent (lytic) nature. **(S7-S8)** OrthoANIu analysis showing nucleotide identity between SAKp26.2 and closely related Klebsiella phages. **(S9)** Heatmap representing PC-based intergenomic distance among SAKp26.2 and related phages, supporting its classification as a novel member of the family Autographiviridae.

**S11**

**S10**


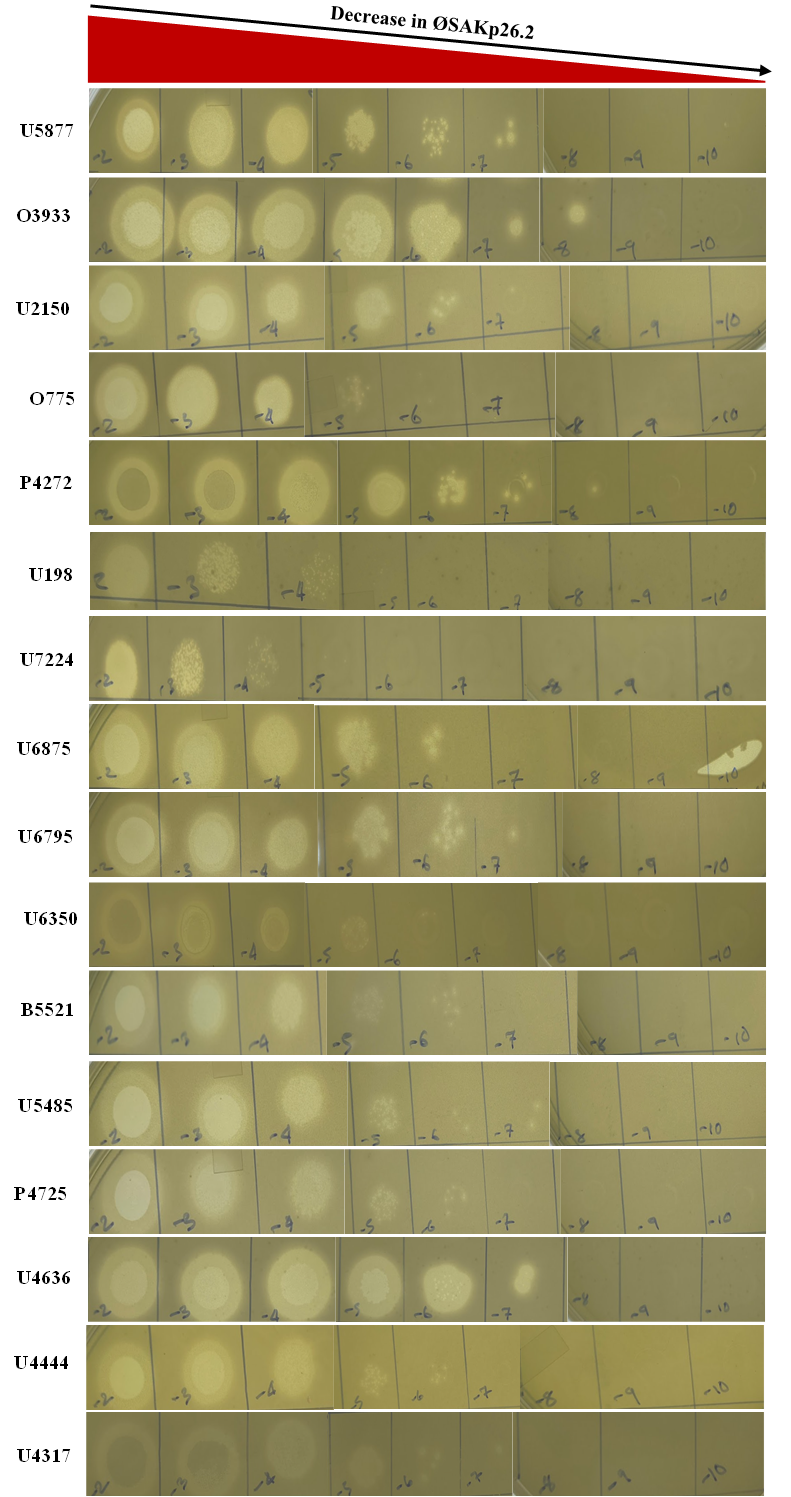


**S12**

**S13**

(**S10)** **Spot assay of SAKp26.2 on the lawn of 16 clinical isolates of *K. pneumoniae*:** Lytic activity of bacteriophage SAKp26.2 was observed at varying phage dilutions. Plaque formation was detected up to 10⁻⁷ dilution for U5877, U2150, U6795, U5485, and U4636; up to 10⁻⁸ for O3933, P4272, and U198; up to 10⁻⁶ for U6875, B5521, P4725, and U4444; up to 10⁻⁵ for O775; and up to 10⁻⁴ for U7224. Inefficient infection was observed in U6350 up to 10⁻⁵ dilution and in U4317 up to 10⁻⁷ dilution.

**To determine the reference host**; SAKp26.2 was amplified in three different bacterial strains. **(S11)** SAKp26.2 was amplified in O3933, and a small-drop plaque assay was performed using the purified phage on O3933, P4725, and U5877. **(S12)** SAKp26.2 was amplified in P4725, followed by a small-drop plaque assay with the purified phage on O3933, P4725, and U5877. **(S13)** SAKp26.2 was amplified in U5877, and the purified phage was subsequently tested by small-drop plaque assay on O3933, P4725, and U5877. Phage titers were calculated based on the number of plaques formed, and the corresponding graphs were plotted accordingly.


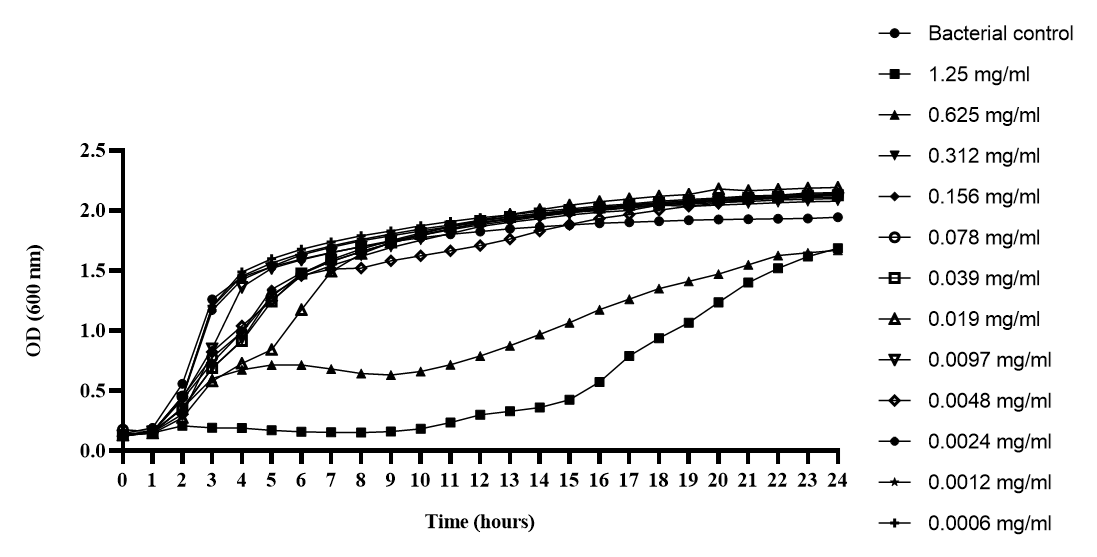


Ceftazidime

**S14**


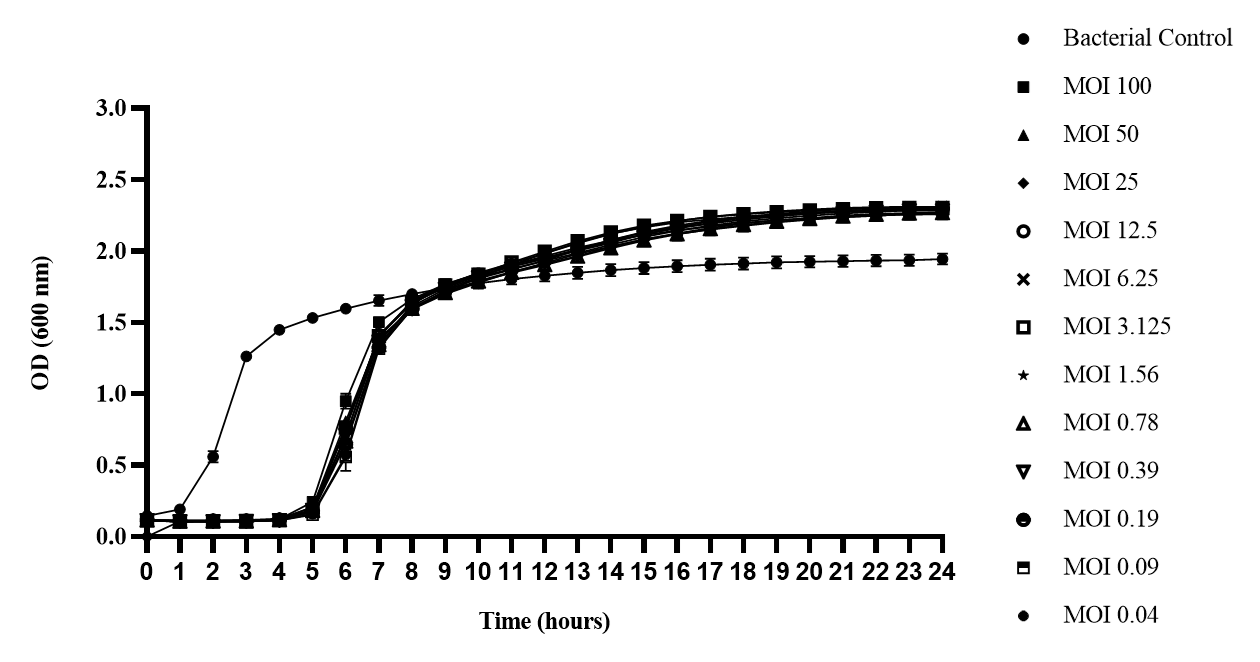


Phage

**S15**


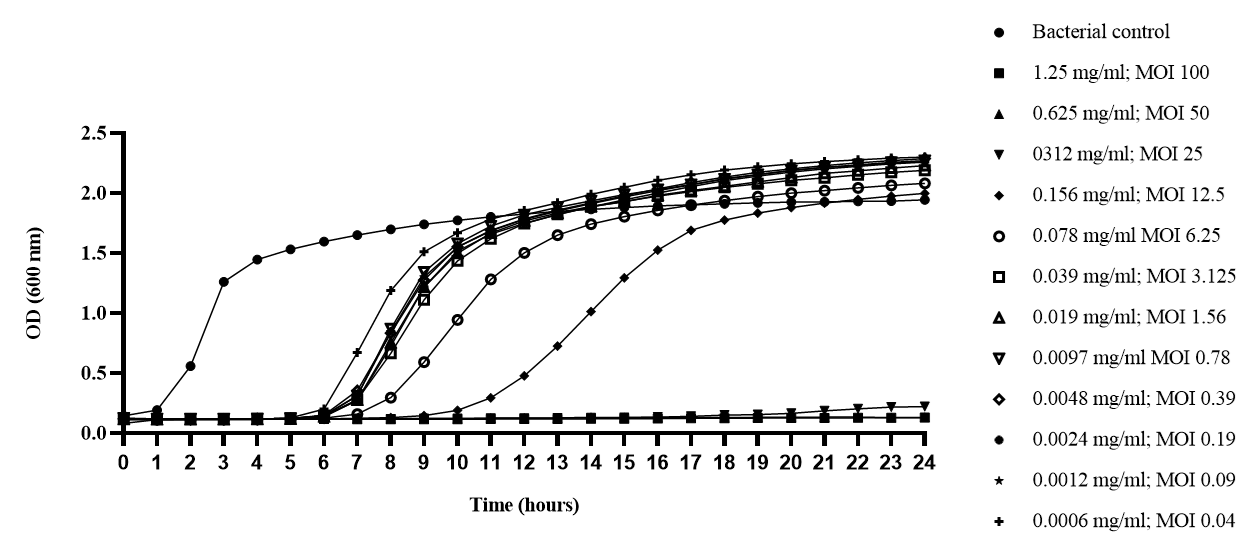


**S18**

Phage + Gentamicin


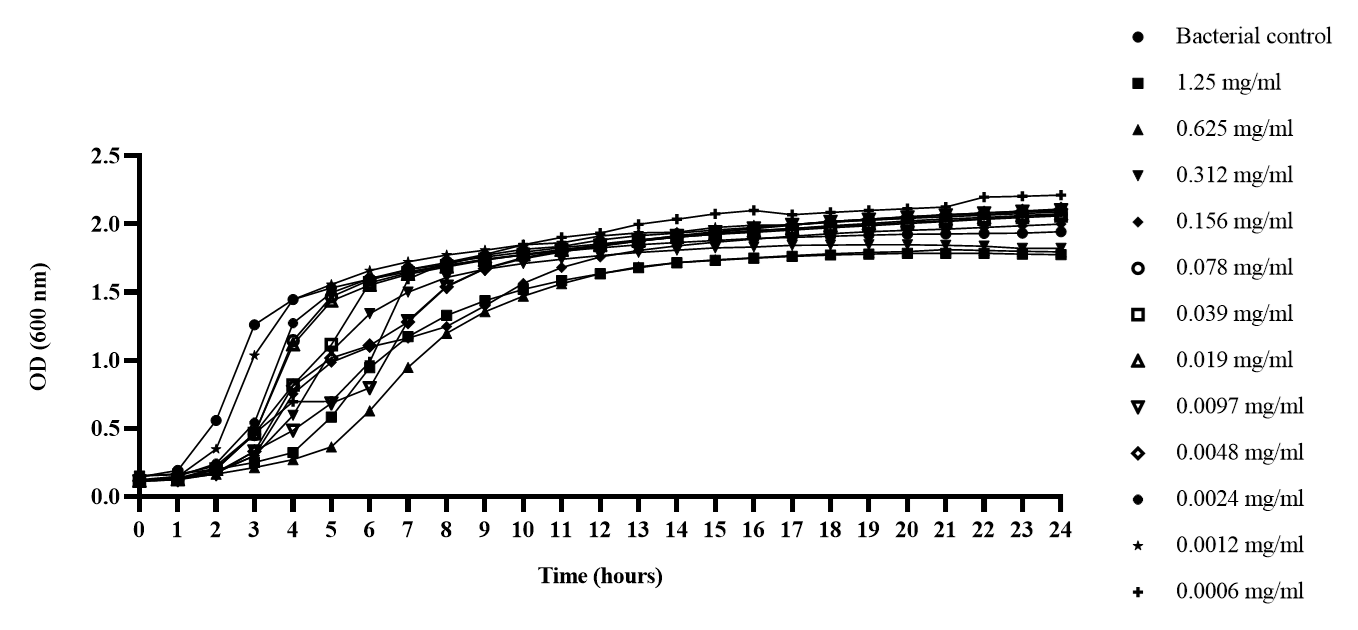


**S17**

Gentamicin


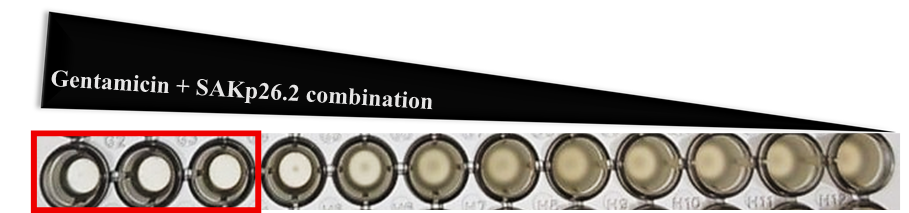


**S19**

**S16**

Phage +Ceftazidime

**Phage antibiotic combination: (S14)** Kill-kinetics curve of bacterial host upon ceftazidime treatment at different concentrations **(S15)** Kill-kinetics curve of bacterial host upon phage-only treatment at different MOIs **(S15)** Kill-kinetics curve of bacterial host upon ceftazidime-phage combination treatment **(S16)** Kill-kinetics curve of bacterial host upon gentamicin treatment **(S17)** Kill-kinetics curve of bacterial host upon gentamicin-phage combination treatment **(S18)** Visual representation of bacterial growth in the gentamicin-SAKp26.2 combination assay.

| **CDS** | **Start** | **Stop** | **Length** | **Strand** | **Protein** |
| --- | --- | --- | --- | --- | --- |
| 1 | 1 | 258 | 257 | + | Phage terminase small subunit |
| 2 | 355 | 804 | 449 | + | Phage Rz-like lysis protein |
| 3 | 797 | 2554 | 1757 | + | Phage terminase large subunit |
| 4 | 4089 | 4556 | 467 | + | Phage S-adenosyl-L-methionine hydrolase |
| 5 | 5129 | 6235 | 1106 | + | Phage serine/threonine kinase |
| 6 | 6305 | 9025 | 2720 | + | Phage DNA-directed RNA polymerase |
| 7 | 9309 | 9485 | 176 | + | hypothetical protein |
| 8 | 9489 | 9605 | 116 | + | hypothetical protein |
| 9 | 9586 | 9879 | 293 | + | hypothetical protein |
| 10 | 10098 | 10211 | 113 | + | hypothetical protein |
| 11 | 10312 | 11376 | 1064 | + | Phage-associated ATP-dependent DNA ligase |
| 12 | 11576 | 11839 | 263 | + | hypothetical protein |
| 13 | 11832 | 12257 | 425 | + | Phage nucleotide kinase |
| 14 | 12250 | 12387 | 137 | + | hypothetical protein |
| 15 | 12374 | 12499 | 125 | + | hypothetical protein |
| 16 | 12465 | 12629 | 164 | + | hypothetical protein |
| 17 | 12696 | 13394 | 698 | + | Phage single-stranded DNA-binding protein |
| 18 | 13391 | 13834 | 443 | + | Phage HNH homing endonuclease |
| 19 | 13807 | 14256 | 449 | + | Phage endonuclease I |
| 20 | 14344 | 14805 | 461 | + | Phage endolysin |
| 21 | 14954 | 15073 | 119 | + | hypothetical protein |
| 22 | 15070 | 15435 | 365 | + | hypothetical protein |
| 23 | 15410 | 17128 | 1718 | + | Phage primase/helicase protein |
| 24 | 17200 | 17415 | 215 | + | hypothetical protein |
| 25 | 17416 | 17595 | 179 | + | hypothetical protein |
| 26 | 17608 | 17919 | 311 | + | hypothetical protein |
| 27 | 17992 | 18378 | 386 | + | hypothetical protein |
| 28 | 18395 | 20521 | 2126 | + | Phage DNA-directed DNA polymerase |
| 29 | 20540 | 20827 | 287 | + | hypothetical protein |
| 30 | 20824 | 21033 | 209 | + | hypothetical protein |
| 31 | 21030 | 21314 | 284 | + | hypothetical protein |
| 32 | 21307 | 22212 | 905 | + | Phage exonuclease |
| 33 | 22194 | 22301 | 107 | + | hypothetical protein |
| 34 | 22390 | 22635 | 245 | + | hypothetical protein |
| 35 | 22638 | 22859 | 221 | + | Phage virion protein |
| 36 | 22861 | 23121 | 260 | + | Phage virion assembly protein |
| 37 | 23145 | 24752 | 1607 | + | Phage collar, head-to-tail connector protein |
| 38 | 24856 | 25812 | 956 | + | Phage capsid assembly scaffolding protein |
| 39 | 25954 | 26985 | 1031 | + | Phage major capsid protein |
| 40 | 27042 | 27263 | 221 | + | hypothetical protein |
| 41 | 27329 | 27907 | 578 | + | Phage non-contractile tail tubular protein |
| 42 | 27930 | 30305 | 2375 | + | Phage non-contractile tail tubular protein |
| 43 | 30378 | 30791 | 413 | + | Phage scaffold protein |
| 44 | 30788 | 31174 | 386 | + | Putative integration and excision endonuclease VII |
| 45 | 31179 | 31769 | 590 | + | Phage DNA ejectosome component, internal virion protein |
| 46 | 31769 | 34024 | 2255 | + | Phage DNA ejectosome component, internal virion protein |
| 47 | 34041 | 38006 | 3965 | + | Phage DNA ejectosome component, peptidoglycan lytic exotransglycosylase |
| 48 | 38070 | 41123 | 3053 | + | tail fibers protein |
| 49 | 41134 | 41292 | 158 | + | Phage holin, class II |
| 50 | 41261 | 41434 | 173 | + | Phage holin, class II |

**Supplementary Table 1: Genome annotation of SAKp26.2**
